# Supplementary material
Source: PubMed Central journal article supplement (PMC6834048)
Supplement: rspb20191327supp1.pdf [file rspb20191327supp1.pdf]

# Shear-sensitive adhesion enables size-independent adhesive performance in stick insects. (Supplemental Information)

David Labonte<sup>\*1</sup>, Marie-Yon Struecker<sup>2</sup>, Aleksandra Birn-Jeffery<sup>3</sup> & Walter Federle<sup>2</sup>

<sup>1</sup>Department of Bioengineering, Imperial College, United Kingdom

<sup>2</sup>Department of Zoology, University of Cambridge, United Kingdom

<sup>3</sup>School of Engineering and Materials Science, Queen Mary University of London, United Kingdom

Table S1: Scaling coefficients were obtained with both ordinary least squares and major axis regression. The effect of shear forces on the scaling of adhesive forces is consistent across both regression models, although the exact scaling coefficients differ slightly.

| <i>Ordinary least squares regression</i> | Slope             | Elevation            | Experimental condition     |
|------------------------------------------|-------------------|----------------------|----------------------------|
| Single pad adhesion against mass         | 0.34 (0.27, 0.40) | -1.63 (-1.77, -1.49) | No shear force             |
| Single pad adhesion against mass         | 0.71 (0.61, 0.82) | -1.91 (-2.13, -1.69) | Area-scaled shear force    |
| Single pad adhesion against mass         | 0.86 (0.70, 1.03) | -0.56 (-0.69, -0.42) | Mass-scaled shear force    |
| Whole body adhesion against mass         | 0.68 (0.61, 0.75) | -2.22 (-2.55, -1.90) | Shear force not controlled |
| Single pad adhesive stress against mass  | 0.31 (0.15, 0.46) | 0.40 (0.11, 0.69)    | Mass-scaled shear force    |
| Contact area against mass                | 0.68 (0.62, 0.74) | 3.12 (3.00, 3.24)    | Area-scaled normal load    |
| <i>Reduced major axis regression</i>     | Slope             | Elevation            | Condition                  |
| Single pad adhesion against mass         | 0.43 (0.37, 0.50) | -1.82 (-1.96, -1.68) | No shear force             |
| Single pad adhesion against mass         | 0.76 (0.7, 0.88)  | -2.01 (-2.23, -1.80) | Area-scaled shear force    |
| Single pad adhesion against mass         | 0.94 (0.79, 1.23) | -0.62 (-0.76, -0.49) | Mass-scaled shear force    |
| Whole body adhesion against mass         | 0.71 (0.65, 0.79) | -2.36 (-2.69, -2.04) | Shear force not controlled |
| Single pad adhesive stress against mass  | 0.45 (0.33, 0.62) | 0.13 (-0.16, 0.43)   | Mass-scaled shear force    |
| Contact area against mass                | 0.70 (0.64, 0.76) | 3.08 (2.96, 3.20)    | Area-scaled normal load    |

\*d.labonte@imperial.ac.uk
